# Supplementary material for: Simultaneous identification of point mutations via DNA ligase-mediated gold nanoparticle assembly
Source: Royal Society of Chemistry journal article supplement (doi:10.1039/b717853k), 2008-01-01
Supplement: b717853k.pdf [file b717853k.pdf]

**Supplementary for:**  
**Simultaneous Identification of Point Mutations via DNA Ligase-mediated  
Gold Nanoparticle Assembly**

Jishan Li,<sup>1</sup> Jian-Hui Jiang\*,<sup>1</sup> Xiang-Min Xu,<sup>2</sup> Xia Chu,<sup>1</sup> Cheng Jiang,<sup>1</sup> Guoli Shen\*,<sup>1</sup> Ru-Qin Yu<sup>1</sup>

1. State Key Laboratory for Chemo/Biosensing and Chemometrics, College of Chemistry and Chemical Engineering, Hunan University, Changsha 410082, P. R. China
2. Department of Medical Genetics, School of Basic Medical Sciences, Southern Medical University, Guangzhou 510515, P. R. China.

E-mail: jianhuijiang@hnu.cn, glshen@hnu.cn

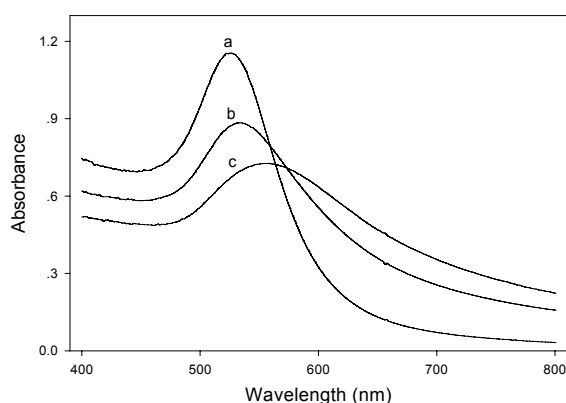

**Figure S1** UV-vis spectra of the reaction mixture. Curve a, before hybridization; curve b, after incubating at 55°C for 60 min; curve c, after incubating at 40°C for another 60 min. The reaction mixture was composed of 208 nM of T4, 242 nM of T2 and 75  $\mu$ L of P1, P2, P3 and P4 each. The hybridization of T2 and T4 with gold nanoparticle-tagged probes was carried out in 0.3 M KCl - 0.1% (v/v) Triton X-100 - 30 mM Tris-HCl solution (pH 7.8).

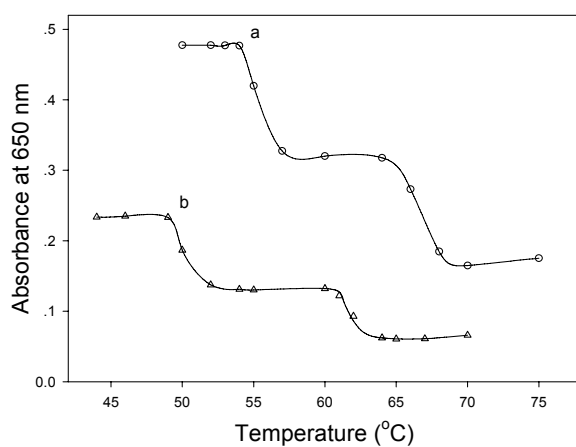

**Figure S2** The melting analysis of nanoparticle aggregates in the 0.3 M KCl and 0.1 M KCl solution, respectively. Treatment of samples: for curve a, the reaction mixture containing 75  $\mu\text{L}$  of each gold probe (P1, P2, P3, P4) and 208 nM of T4 and 242 nM of T2 was first incubated at 55°C for 60 min, and then at 40°C for another 60 min; for curve b, 100  $\mu\text{L}$  of the reaction mixture described in curve a was diluted to 300  $\mu\text{L}$  with a 0.1% (v/v) Triton X-100 - 30 mM Tris-HCl dilution buffer (pH 7.8). Absorbance values at 650 nm were recorded at 1°C interval with a holding time of 0.5 min/deg.

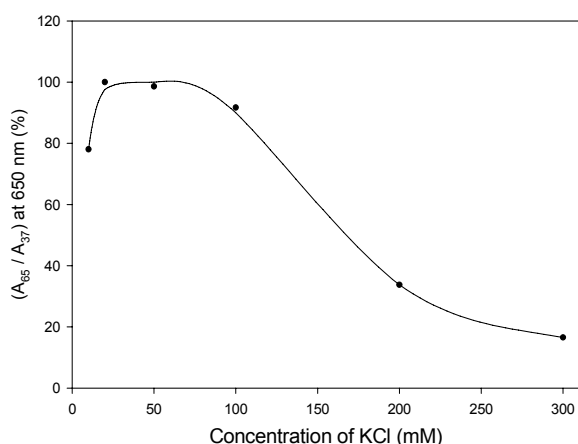

**Figure S3** The effect of K<sup>+</sup> concentration on the ligation efficiency. Treatment of samples: the reaction mixture containing P3 (5'-SH-(CH<sub>2</sub>)<sub>6</sub>-cgttactgccctgtggggca-3'), P4 and T3 was incubated at 55 °C for 60 min. Then the solution was diluted to 600 μL with the concentration of 0.032 U/ μL *E. coli* DNA ligase, 4 mM Mg<sup>2+</sup>, 0.05% BSA, 0.1 mM NAD<sup>+</sup> and different K<sup>+</sup> concentrations. After ligation at 37 °C for 30 min, the reaction mixture was heated to denature the formed DNA-linked aggregates at 65 °C. The absorbance at 650 nm was recorded before (A<sub>37</sub>) and after (A<sub>65</sub>) denaturing. To quantitatively measure the efficiency of the ligase in such optimization experiments, one could use the ratio (in percent) of the absorbance of the ligase-treated nanoparticle aggregate solution after heat denaturing at 65 °C to initial absorbance of the solution at 650 nm. That is, the ligase efficiency is defined as  $\frac{A_{65}}{A_{37}} \times 100\%$ , where A<sub>37</sub> is the

absorbance measured at 37 °C for the nanoparticle aggregate solution of target T3 with probes P3 and P4 subjected to the ligase reaction, and A<sub>65</sub> is the absorbance of the solution on heat denaturing at 65 °C. This ligase efficiency measure is based on the fact that, when the ligase reaction is performed for all perfectly matched duplex, the oligonucleotide-labeled gold nanoparticles are covalently linked together and would not melt apart and show no absorbance decrease on denaturing treatment.

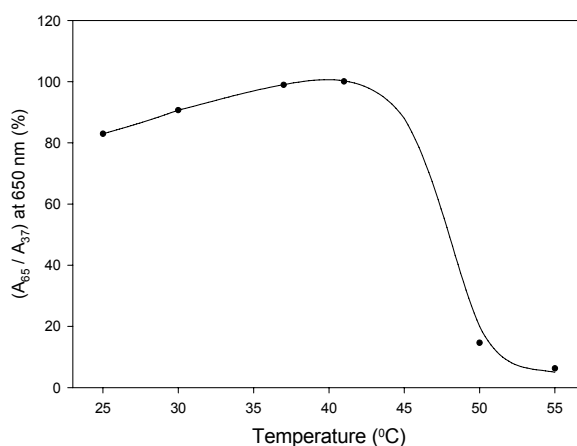

**Figure S4** The effect of temperature on the ligation efficiency. Treatment of samples: the reaction mixtures containing P3 (5'-SH-(CH<sub>2</sub>)<sub>6</sub>-cgttactgcctgtggggca-3'), P4 and T3 were incubated at 55 °C for 60 min. Then these solutions were diluted to 600 μL with the concentration of 0.032 U/ μL *E. coli* DNA ligase, 4 mM Mg<sup>2+</sup>, 0.05% BSA, 0.1 mM NAD<sup>+</sup> and 50 mM K<sup>+</sup>. After ligation at different temperature for 30 min, the experiments were carried out as described in Figure S2.

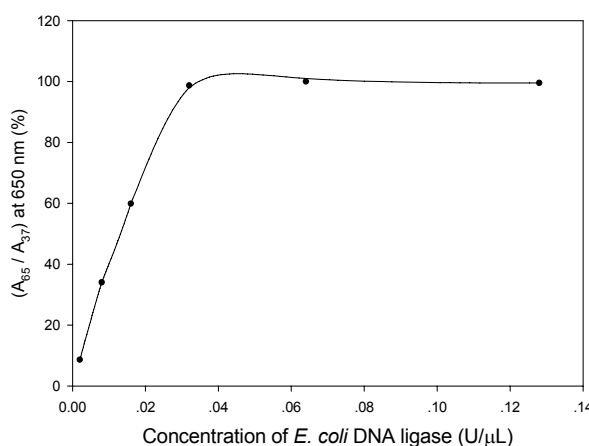

**Figure S5** The effect of concentration of *E. coli* DNA ligase on the ligation efficiency. Treatment of samples: the reaction mixtures containing P3 (5'-SH-(CH<sub>2</sub>)<sub>6</sub>-cgttactgcctgtggggca-3'), P4 and T3 were incubated at 55 °C for 60 min. Then these solutions were diluted to 600 μL with the concentration of 4 mM Mg<sup>2+</sup>, 0.05% BSA, 0.1 mM NAD<sup>+</sup>, 50 mM K<sup>+</sup> and different *E. coli* DNA ligase concentration. After ligation at 37 °C for 30 min, the experiments were carried out as described in Figure S2.

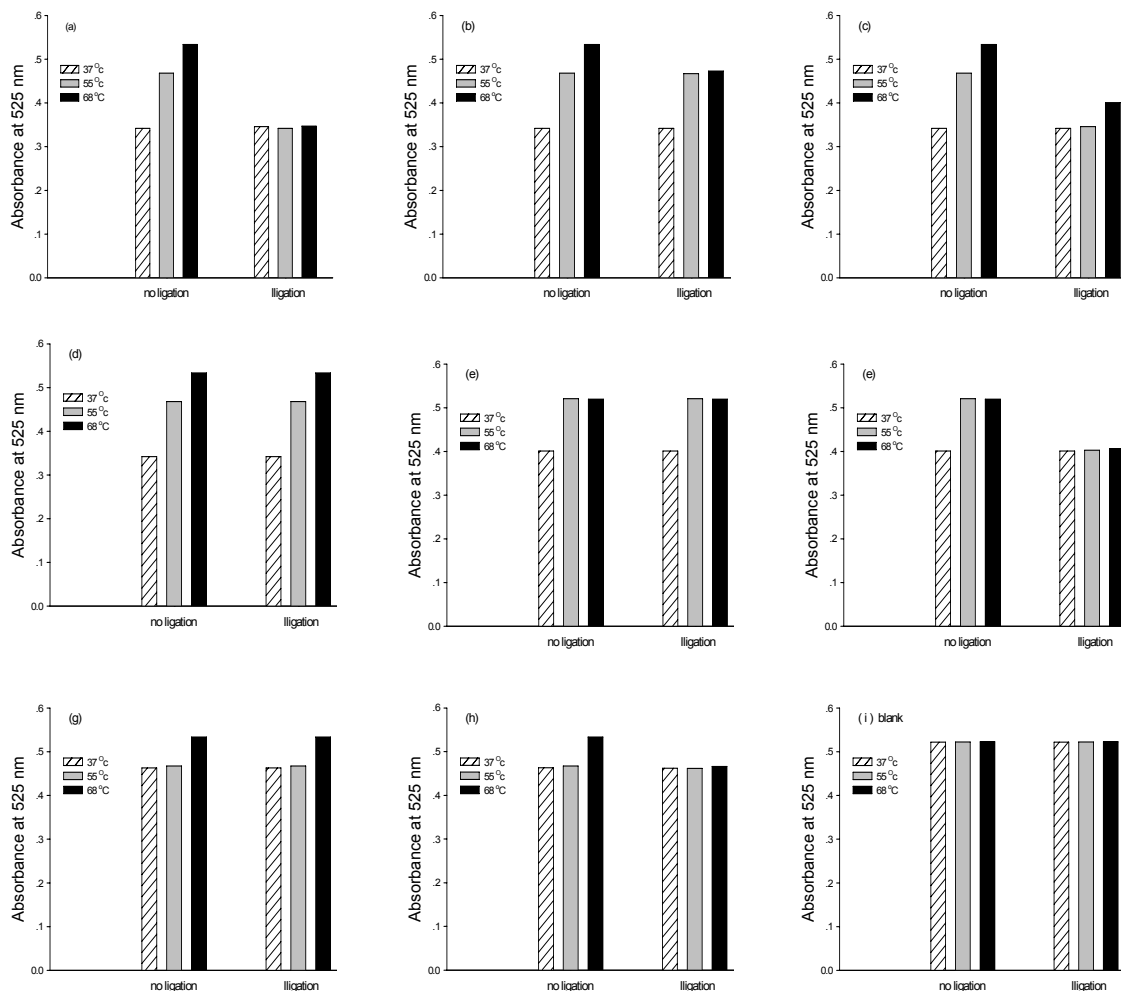

**Figure S6** Ligation analysis of perfect-match or mismatch targets using Au nanoparticle probes. Treatment of samples: the reaction mixture contains 25  $\mu\text{L}$  of each gold probe (P1, P2, P3, P4). (a), 121 nM of T2 + 104 nM of T4; (b), 121 nM of T1 + 104 nM of T4; (c), 121 nM of T2 + 104 nM of T3; (d), 121 nM of T1 + 104 nM of T3; (e), 121 nM of T1; (f), 121 nM of T2; (g), 104 nM of T3; (h), 104 nM of T4; (i), blank. The reaction mixtures were first incubated at 55  $^{\circ}\text{C}$  for 60 min, and then at 40  $^{\circ}\text{C}$  for another 60 min. Then these solutions were diluted to 300  $\mu\text{L}$  with the concentration of 0.12 U/ $\mu\text{L}$  E.coli DNA ligase, 4 mM  $\text{Mg}^{2+}$ , 0.05% BSA, 0.1 mM  $\text{NAD}^{+}$  and 100 mM  $\text{K}^{+}$ . After ligation at 37  $^{\circ}\text{C}$  for 30 min, the melting analysis was carried out. For 'no ligation', the reaction mixture contained DNA target, but the ligase was not added; for 'ligation', the reaction mixture contained DNA target, moreover, the ligation process was carried out.

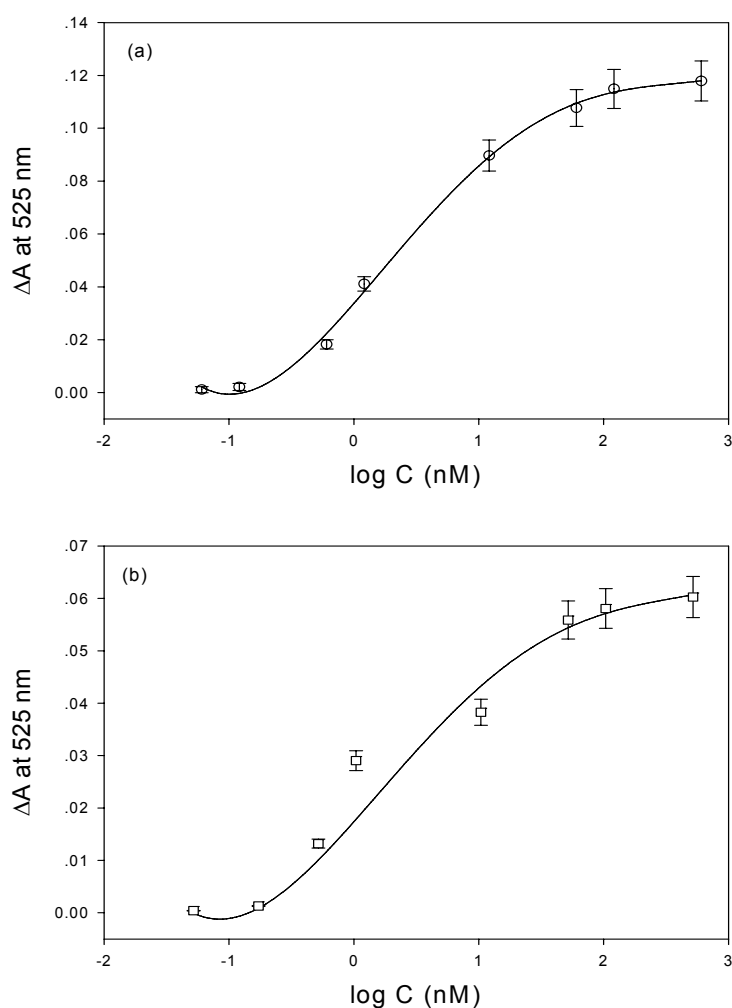

**Figure S7** Quantitative analysis of the targets gene concentration using UV-vis spectrophotometry. For figure 3s (a) (or figure 3s (b)), the reaction mixture containing a certain concentration of T2 (or T4) and 25  $\mu\text{L}$  of each gold probe (P1, P2, P3, P4) was first incubated at 40 $^{\circ}\text{C}$  (or 55  $^{\circ}\text{C}$ ) for 60 min, and then the solution was diluted to 300  $\mu\text{L}$  with the concentration of 0.12 U/  $\mu\text{L}$  *E. coli* DNA ligase, 4 mM  $\text{Mg}^{2+}$ , 0.05% BSA, 0.1 mM  $\text{NAD}^{+}$  and 0.1 M  $\text{K}^{+}$ . After ligation at 37 $^{\circ}\text{C}$  for 30 min, the reaction mixture was heated to denature the formed DNA-linked aggregates at 55 $^{\circ}\text{C}$  (or 68 $^{\circ}\text{C}$ ). The absorbance at 525 nm was recorded before (37 $^{\circ}\text{C}$ ) and after (55 $^{\circ}\text{C}$  or 68 $^{\circ}\text{C}$ ) denaturing. The standard deviations obtained by five repeated measurements were shown as the error bars.

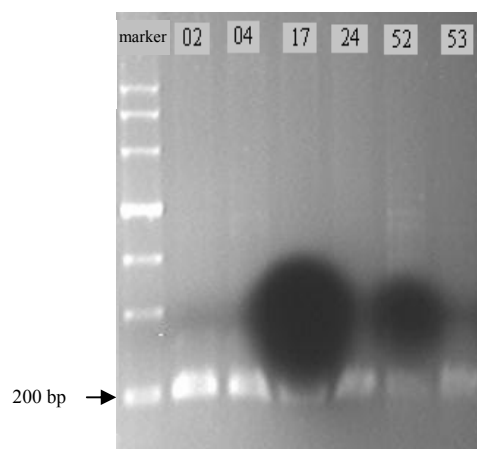

**Figure S8** The sol-gel image of PCR products. 1.2% TBE Agarose Gel. Sample 02, 2 years old; sample 04, 4 years old; sample 17, 17 years old; sample 24, 24 years old; sample 52, 52 years old; sample 53, 53 years old.

The GenBank reference sequence (accession number: AY128650) :

1 tcaccctgtg gagccacacc ctagggttgg ccaatctact cccaggagca gggagggcag  
61 gagccagggc tgggcataaa agtcagggca gagccatcta ttgcttacat ttgcttctga  
121 cacaactgtg ttcactagca acctcaaaac gacaccatgg tgcactctgac tcctgtggag  
181 aagtctgccg ttactgccct gtggggcaag gtgaacgtgg atgaagttgg tggtgaggcc  
241 ctgggcaggt tggatatcaag gttacaagac aggtttaagg agaccaatag aaactgggca  
301 tgtggagaca gagaagactc ttgggttct gataggcact gactctctct gcctattggt  
361 ctattttccc acccttaggc tgcctgggt ctacccttgg acccagaggt tctttgagtc  
421 ctttggggat ctgtccactc ctgatgctgt tatgggcaac cctaaggtga aggctcatgg  
481 caagaaagtg ctcgggtcct ttagtgatgg cctggctcac ctggacaacc tcaagggcac  
541 ctttgcaca ctgagtgagc tgcactgtga caagctgcac gtggatcctg agaacttcag  
601 ggtgagtcta tgggacgctt gatgttttct tcccccttct tttctatggt taagtcatg  
661 tcataggaag gggataagta acagggtaca gtttagaatg ggaaacagac gaatgattgc  
721 atcagtgtgg aagtctcagg atcgttttag tttcttttat ttgctgttca taacaattgt  
781 tttcttttgt ttaattcttg ctttctttt tttcttctc cgcaattttt actattatac  
841 ttaatgcctt aacattgtgt ataacaaaag gaaatatctc tgagatacat taagtaactt  
901 aaaaaaaaaac tttacacagt ctgcctagta cattactatt tggaatatat gtgtgcttat  
961 ttgcatatc ataatecccc tactttattt tcttttattt ttaattgata cataatcatt  
1021 atacatattt atgggttaaa gtgtaatgtt ttaatatgtg tacacatatt gaccaaatca  
1081 gggtaatttt gcatttgtaa ttttaaaaaa tgctttcttc ttttaatata ctttttgtt  
1141 tatcttattt ctaatacttt ccctaactc tttctttcag ggcaataatg atacaatgta  
1201 tcatgcctct ttgcaccatt ctaaagaata acagtgataa tttctgggtt aaggcaatag  
1261 caatatctct gcatataaat atttctgcat ataaattgta actgatgtaa gaggtttcat  
1321 attgctaata gcagctacaa tccagctacc attctgcttt tattttatgg ttgggataag  
1381 gctggattat tctgagteca agctaggecc ttttgctaat catgttcata cctcttatct  
1441 tcctcccacg gctcctgggc aacgtgctgg tctgtgtgct ggcccatcac tttggcaaag  
1501 aattcacccc accagtgcag gctgctatc agaaagtggg ggctgggtgtg gctaatgccc  
1561 tggcccacaa gtatcactaa gctcgcttc ttgctgtcca atttctatta aaggttcctt  
1621 tgttccctaa gtccaactac taaactgggg gatattatga agggccttga gcactctggat  
1681 tctgcctnat aaaaaacatt tattttcatt gcaatgatgt atttaatta tttctgaata  
1741 ttttactaaa aagggaatgt gggaggtcag tgcatttaa aca
